# Supplementary material for: Molecular Identification of Asian Hornet Vespa velutina nigrithorax Prey from Larval Gut Contents: A Promising Method to Study the Diet of an Invasive Pest
Source: MDPI journal article supplement (doi:10.3390/ani13030511), 2023-02-01
Supplement: s1 [file s1]

Table S1: List of common taxa found among nests analysed and the number of larval samples containing hits for each taxon.

| <b>Group</b>        | <b>Taxon</b>                  | <b>Jersey</b> | <b>Tetbury</b> | <b>Alderney</b> | <b>Gosport</b> | <b>Wool.</b> |
|---------------------|-------------------------------|---------------|----------------|-----------------|----------------|--------------|
| <b>Honey bee</b>    | <i>Apis mellifera</i>         | 9/9           | 3/10           | -               | 3/3            | 10/10        |
| <b>Asian hornet</b> | <i>Vespa velutina</i>         | 1/9           | 1/10           | -               | -              | -            |
| <b>Wasp</b>         | <i>Vespula spp.</i>           | 2/9           | 9/10           | 6/6             | 3/3            | 6/10         |
| <b>Blow fly</b>     | <i>Calliphora spp.</i>        | 9/9           | 2/10           | 6/6             | -              | 4/10         |
| <b>Blow fly</b>     | <i>Lucilia spp.</i>           | 6/9           | 1/10           | 4/6             | 2/3            | -            |
| <b>Blow fly</b>     | <i>Pollenia spp.</i>          | 6/9           | 6/10           | -               | 1/3            | 10/10        |
| <b>Blow fly</b>     | <i>Stomorphina lunata</i>     | 1/9           | -              | -               | -              | -            |
| <b>Hover fly</b>    | <i>Eristalis spp.</i>         | 3/9           | -              | 3/6             | -              | 4/10         |
| <b>Hover fly</b>    | <i>Eumerus spp.</i>           | 2/9           | -              | -               | -              | -            |
| <b>Hover fly</b>    | <i>Scaeva spp.</i>            | -             | -              | 2/6             | -              | -            |
| <b>Hover fly</b>    | <i>Myathropa florea</i>       | 3/9           | -              | -               | -              | -            |
| <b>Hover fly</b>    | <i>Sericomyia spp.</i>        | -             | -              | 1/6             | -              | -            |
| <b>Hover fly</b>    | <i>Syrphus spp.</i>           | -             | -              | 3/6             | -              | -            |
| <b>Hover fly</b>    | <i>Volucella pellucens</i>    | 1/9           | -              | -               | -              | -            |
| <b>House fly</b>    | <i>Helina spp.</i>            | 1/9           | 4/10           | -               | 1/3            | -            |
| <b>House fly</b>    | <i>Musca spp.</i>             | 1/9           | -              | -               | -              | -            |
| <b>House fly</b>    | <i>Phaonia spp.</i>           | -             | 1/10           | -               | -              | -            |
| <b>House fly</b>    | <i>Polietes spp.</i>          | -             | -              | -               | -              | 2/10         |
| <b>Fruit fly</b>    | <i>Drosophila suzukii</i>     | -             | -              | -               | 1/3            | -            |
| <b>Noon fly</b>     | <i>Mesembrina meridiana</i>   | -             | 1/10           | -               | -              | -            |
| <b>Dung fly</b>     | <i>Scathophaga spp.</i>       | 2/9           | -              | -               | -              | 4/10         |
| <b>Flesh fly</b>    | <i>Sarcophaga spp.</i>        | 4/9           | -              | -               | 1/3            | 1/10         |
| <b>Common Fly</b>   | <i>Dryomyza anilis</i>        | -             | 6/10           | -               | -              | -            |
| <b>Soldier fly</b>  | <i>Sargus bipunctatus</i>     | -             | 1/10           | -               | -              | -            |
| <b>Tachinid fly</b> | <i>Tachinidae spp.</i>        | 5/9           | -              | 1/6             | -              | -            |
| <b>Spider</b>       | <i>Araneus diadematus</i>     | -             | 8/10           | -               | 1/3            | 10/10        |
| <b>Spider</b>       | <i>Metellina segmentata</i>   | -             | 2/10           | -               | -              | -            |
| <b>Spider</b>       | <i>Zygiella spp.</i>          | -             | -              | 1/6             | 1/3            | -            |
| <b>Grasshopper</b>  | <i>Acrididae spp.</i>         | -             | -              | -               | -              | 1/10         |
| <b>Mosquito</b>     | <i>Ochlerotatus detritus</i>  | -             | -              | -               | 1/3            | -            |
| <b>Moth</b>         | <i>Phlogophora meticulosa</i> | -             | -              | 1/6             | -              | -            |
| <b>Fungus</b>       | <i>Monodus spp.</i>           | -             | -              | -               | 3/3            | -            |
| <b>Hedgehog</b>     | <i>Erinaceus europaeus</i>    | -             | 1/10           | -               | -              | -            |
| <b>Woodlouse</b>    | <i>Oniscus asellus</i>        | -             | 1/10           | -               | -              | -            |
| <b>Bacteria</b>     | <i>Uncultured bacterium</i>   | 1/9           | 6/10           | 0/6             | 3/3            | 1/10         |
